# Supplementary material
Source: Research Square preprint supplement (doi:10.21203/rs.3.rs-8742497/v1)
Supplement: Supplementary file 1 [file 44aecf1f30020390f8b43c59.xlsx]

## Sheet: 下载品种
CRR822535	qinchuan
CRR822536	qinchuan
CRR822537	qinchuan
CRR822538	qinchuan
CRR822539	qinchuan
CRR822540	qinchuan
CRR822541	qinchuan
CRR822542	qinchuan
CRR822543	qinchuan
CRR822544	qinchuan
CRR822545	qinchuan
CRR822546	qinchuan
CRR822547	qinchuan
CRR822548	qinchuan
CRR822549	qinchuan
CRR822550	qinchuan
CRR822551	qinchuan
CRR822552	qinchuan
CRR822553	qinchuan
CRR822554	qinchuan
CRR822555	qinchuan
CRR822556	qinchuan
CRR822557	qinchuan
CRR822558	qinchuan
CRR822559	qinchuan
CRR822560	qinchuan
CRR822561	qinchuan
CRR822562	qinchuan
CRR822563	qinchuan
CRR822564	qinchuan
CRR822565	qinchuan
CRR822566	qinchuan
CRR822567	qinchuan
CRR822568	qinchuan
CRR822569	qinchuan
CRR822570	qinchuan
CRR822571	qinchuan
CRR822572	qinchuan
CRR822573	qinchuan
CRR822574	qinchuan
CRR822575	qinchuan
CRR822576	qinchuan
CRR822577	qinchuan
CRR822578	qinchuan
CRR822579	qinchuan
CRR822580	qinchuan
CRR822581	qinchuan
CRR822582	qinchuan
CRR822583	qinchuan
CRR822584	qinchuan
CRR822585	qinchuan
CRR822586	qinchuan
CRR822587	qinchuan
CRR822588	qinchuan
CRR822589	qinchuan
CRR822590	qinchuan
CRR822591	qinchuan
CRR822592	qinchuan
CRR822593	qinchuan
CRR822594	qinchuan
CRR822595	qinchuan
CRR822596	qinchuan
CRR822597	qinchuan
CRR822598	qinchuan
CRR822599	qinchuan
CRR822600	qinchuan
CRR822601	qinchuan
CRR822602	qinchuan
CRR822603	qinchuan
CRR822604	qinchuan
CRR822605	qinchuan
CRR822606	qinchuan
CRR822607	qinchuan
CRR822608	qinchuan
CRR822609	qinchuan
CRR822610	qinchuan
CRR822611	qinchuan
CRR822612	qinchuan
CRR822613	qinchuan
CRR822614	qinchuan
CRR822615	qinchuan
CRR822616	qinchuan
CRR822617	qinchuan
CRR822618	qinchuan
CRR822619	qinchuan
CRR822620	qinchuan
CRR822621	qinchuan
CRR822622	qinchuan
CRR822623	qinchuan
CRR822624	qinchuan
CRR822625	qinchuan
CRR822626	qinchuan
CRR822627	qinchuan
CRR822628	qinchuan
CRR822629	qinchuan
CRR822630	qinchuan
CRR822631	qinchuan
CRR822632	qinchuan
CRR822633	qinchuan
CRR822634	qinchuan
CRR822635	qinchuan
CRR822636	qinchuan
CRR822637	qinchuan
CRR822638	qinchuan
CRR822639	qinchuan
CRR822640	qinchuan
CRR822641	qinchuan
CRR822642	zaosheng
CRR822643	zaosheng
CRR822644	zaosheng
CRR822645	zaosheng
CRR822646	zaosheng
CRR822647	zaosheng
CRR822648	zaosheng
CRR822649	zaosheng
CRR822650	zaosheng
CRR822651	zaosheng
CRR822652	zaosheng
CRR822653	zaosheng
CRR822654	zaosheng
CRR822655	zaosheng
CRR822656	zaosheng
CRR822657	zaosheng
CRR822658	zaosheng
CRR822659	zaosheng
CRR822660	zaosheng
SRR1346376	Angus
SRR1348573	Angus
SRR1355237	Angus
SRR1365129	Angus
SRR1365144	Angus
SRR1425124	Angus
SRR1525582	Angus
SRR1525583	Angus
SRR1525686	Angus
SRR1525687	Angus
SRR1525688	Angus
SRR1343160	Hereford
SRR1346382	Hereford
SRR1346383	Hereford
SRR1346385	Hereford
SRR1346387	Hereford
SRR1365124	Hereford
SRR1365126	Hereford
SRR1365128	Hereford
SRR1365131	Hereford
SRR1365137	Hereford
SRR1343172	Red Angus
SRR1355239	Red Angus
SRR1365103	Red Angus
SRR1365113	Red Angus
SRR1525580	Red Angus
SRR1525581	Red Angus
SRR1525600	Red Angus
SRR1525613	Red Angus
SRR1525614	Red Angus
SRR1343167	Charolais
SRR1343168	Charolais
SRR1343171	Charolais
SRR1343173	Charolais
SRR1348571	Charolais
SRR1348584	Charolais
SRR1355254	Charolais
SRR1355258	Charolais
SRR1365122	Charolais
SRR1365145	Charolais
SRR1343166	Gelbvieh
SRR1355236	Gelbvieh
SRR1365112	Gelbvieh
SRR1346388	Gelbvieh
SRR1348575	Gelbvieh
SRR1425154	Gelbvieh
SRR3497161	Jersey
SRR3497162	Jersey
SRR3497451	Jersey
SRR3497462	Jersey
SRR3497464	Jersey
SRR3497465	Jersey
SRR3497466	Jersey
SRR3497467	Jersey
SRR3497611	Jersey
SRR3497613	Jersey
SRR1525617	Simmental
SRR1525619	Simmental
SRR1525621	Simmental
SRR1525700	Simmental
SRR1525701	Simmental
SRR1525702	Simmental
SRR1525703	Simmental
SRR1525705	Simmental
SRR1525596	Piedmontese
SRR1525599	Piedmontese
SRR1525603	Piedmontese
SRR1525604	Piedmontese
SRR1525606	Piedmontese
SRR934415	Hanwoo
SRR934417	Hanwoo
SRR934418	Hanwoo
SRR934419	Hanwoo
SRR934432	Hanwoo
SRR934433	Hanwoo
SRR934435	Hanwoo
SRR6024571, SRR5507249	Tibetan
SRR6024572,SRR5507248	Tibetan
SRR5507247	Tibetan
SRR5507246	Tibetan
SRR5507245	Tibetan
SRR5507267	Mongolia
SRR5507266	Mongolia
SRR5507265	Mongolia
SRR5507264	Mongolia
SRR5507263	Mongolia
SRR6936540	Sahiwal
SRR6936538	Tharparkar
SRR6936539	Hariana
SRR2016762	Nelore
SRR2016752	Gir
SRR2016754	Gir
SRR6423815,SRR6423816	Indian
SRR6024573,SRR5507199	Wannan
SRR6024574,SRR5507198	Wannan
SRR5507197	Wannan
SRR5507196	Wannan
SRR5507195	Wannan
SRR5507286	Guangfeng
SRR5507285	Guangfeng
SRR5507284	Guangfeng
SRR5507283	Guangfeng
SRR5507282	Ji'an
SRR5507281	Ji'an
SRR5507280	Ji'an
SRR5507279	Ji'an
SRR5507190	Leiqiong
SRR5507189	Leiqiong
SRR5507188	Leiqiong
SRR5507278	Jinjiang
SRR5507276	Jinjiang
SRR5507275	Jinjiang
SRR5507274	Jinjiang
SRR5507237	Nanyang
SRR5507236	Nanyang
SRR5507235	Nanyang
SRR5507234	Nanyang
SRR5507233	Nanyang
SRR11875130	Jiaxian
SRR11875131	Jiaxian
SRR11875132	Jiaxian
SRR11875133	Jiaxian
SRR11875134	Jiaxian
SRR11875135	Jiaxian
SRR11875136	Jiaxian
SRR11875137	Jiaxian
SRR11875138	Jiaxian
SRR11875139	Jiaxian
SRR11875140	Jiaxian
SRR11875141	Jiaxian
SRR11875142	Jiaxian
SRR11875143	Jiaxian
SRR11875144	Jiaxian
SRR11875145	Jiaxian
SRR11875146	Jiaxian
SRR11875147	Jiaxian
SRR11875148	Jiaxian
SRR11875149	Jiaxian
SRR11875150	Jiaxian
SRR11875151	Jiaxian
SRR11875152	Jiaxian
SRR11875153	Jiaxian
SRR11875154	Jiaxian
SRR11875155	Jiaxian
SRR11875156	Jiaxian
SRR11875157	Jiaxian
SRR11875158	Jiaxian
SRR11875159	Jiaxian

## Sheet: 分组
CRR822535	A
CRR822536	A
CRR822537	A
CRR822538	A
CRR822539	A
CRR822540	A
CRR822541	A
CRR822542	A
CRR822543	A
CRR822544	A
CRR822545	A
CRR822546	A
CRR822547	A
CRR822548	A
CRR822549	A
CRR822550	A
CRR822551	A
CRR822552	A
CRR822553	A
CRR822554	A
CRR822555	A
CRR822556	A
CRR822557	A
CRR822558	A
CRR822559	A
CRR822560	A
CRR822561	A
CRR822562	A
CRR822563	A
CRR822564	A
CRR822565	A
CRR822566	A
CRR822567	A
CRR822568	A
CRR822569	A
CRR822570	A
CRR822571	A
CRR822572	A
CRR822573	A
CRR822574	A
CRR822575	A
CRR822576	A
CRR822577	A
CRR822578	A
CRR822579	A
CRR822580	A
CRR822581	A
CRR822582	A
CRR822583	A
CRR822584	A
CRR822585	A
CRR822586	A
CRR822587	A
CRR822588	A
CRR822589	A
CRR822590	A
CRR822591	A
CRR822592	A
CRR822593	A
CRR822594	A
CRR822595	A
CRR822596	A
CRR822597	A
CRR822598	A
CRR822599	A
CRR822600	A
CRR822601	A
CRR822602	A
CRR822603	A
CRR822604	A
CRR822605	A
CRR822606	A
CRR822607	A
CRR822608	A
CRR822609	A
CRR822610	A
CRR822611	A
CRR822612	A
CRR822613	A
CRR822614	A
CRR822615	A
CRR822616	A
CRR822617	A
CRR822618	A
CRR822619	A
CRR822620	A
CRR822621	A
CRR822622	A
CRR822623	A
CRR822624	A
CRR822625	A
CRR822626	A
CRR822627	A
CRR822628	A
CRR822629	A
CRR822630	A
CRR822631	A
CRR822632	A
CRR822633	A
CRR822634	A
CRR822635	A
CRR822636	A
CRR822637	A
CRR822638	A
CRR822639	A
CRR822640	A
CRR822641	A
CRR822642	A
CRR822643	A
CRR822644	A
CRR822645	A
CRR822646	A
CRR822647	A
CRR822648	A
CRR822649	A
CRR822650	A
CRR822651	A
CRR822652	A
CRR822653	A
CRR822654	A
CRR822655	A
CRR822656	A
CRR822657	A
CRR822658	A
CRR822659	A
CRR822660	A
SRR1346376	B
SRR1348573	B
SRR1355237	B
SRR1365129	B
SRR1365144	B
SRR1425124	B
SRR1525582	B
SRR1525583	B
SRR1525686	B
SRR1525687	B
SRR1525688	B
SRR1343160	B
SRR1346382	B
SRR1346383	B
SRR1346385	B
SRR1346387	B
SRR1365124	B
SRR1365126	B
SRR1365128	B
SRR1365131	B
SRR1365137	B
SRR1343172	B
SRR1355239	B
SRR1365103	B
SRR1365113	B
SRR1525580	B
SRR1525581	B
SRR1525600	B
SRR1525613	B
SRR1525614	B
SRR1343167	B
SRR1343168	B
SRR1343171	B
SRR1343173	B
SRR1348571	B
SRR1348584	B
SRR1355254	B
SRR1355258	B
SRR1365122	B
SRR1365145	B
SRR1343166	B
SRR1355236	B
SRR1365112	B
SRR1346388	B
SRR1348575	B
SRR1425154	B
SRR3497161	B
SRR3497162	B
SRR3497451	B
SRR3497462	B
SRR3497464	B
SRR3497465	B
SRR3497466	B
SRR3497467	B
SRR3497611	B
SRR3497613	B
SRR1525617	B
SRR1525619	B
SRR1525621	B
SRR1525700	B
SRR1525701	B
SRR1525702	B
SRR1525703	B
SRR1525705	B
SRR1525596	B
SRR1525599	B
SRR1525603	B
SRR1525604	B
SRR1525606	B
SRR934415	C
SRR934417	C
SRR934418	C
SRR934419	C
SRR934432	C
SRR934433	C
SRR934435	C
SRR6024571, SRR5507249	C
SRR6024572,SRR5507248	C
SRR5507247	C
SRR5507246	C
SRR5507245	C
SRR5507267	C
SRR5507266	C
SRR5507265	C
SRR5507264	C
SRR5507263	C
SRR6936540	C
SRR6936538	C
SRR6936539	C
SRR2016762	C
SRR2016752	C
SRR2016754	C
SRR6024573,SRR5507199	D
SRR6024574,SRR5507198	D
SRR5507197	D
SRR5507196	D
SRR5507195	D
SRR5507286	D
SRR5507285	D
SRR5507284	D
SRR5507283	D
SRR5507282	D
SRR5507281	D
SRR5507280	D
SRR5507279	D
SRR5507190	D
SRR5507189	D
SRR5507188	D
SRR5507278	D
SRR5507276	D
SRR5507275	D
SRR5507274	D
SRR5507237	D
SRR5507236	D
SRR5507235	D
SRR5507234	D
SRR5507233	D
SRR11875130	D
SRR11875131	D
SRR11875132	D
SRR11875133	D
SRR11875134	D
SRR11875135	D
SRR11875136	D
SRR11875137	D
SRR11875138	D
SRR11875139	D
SRR11875140	D
SRR11875141	D
SRR11875142	D
SRR11875143	D
SRR11875144	D
SRR11875145	D
SRR11875146	D
SRR11875147	D
SRR11875148	D
SRR11875149	D
SRR11875150	D
SRR11875151	D
SRR11875152	D
SRR11875153	D
SRR11875154	D
SRR11875155	D
SRR11875156	D
SRR11875157	D
SRR11875158	D
SRR11875159	D
991A	S
997A	S
1030A	S
1043A	S
1048A	S
1134A	S
1135A	S
1139A	S
1142A	S
1155A	S
1156A	S
1178A	S
1184A	S
1194A	S
1201A	S
1206A	S
1221A	S
1259A	S
1262A	S
1275A	S
1279A	S
1290A	S
1295A	S
1297A	S
1298A	S
1299A	S
1304A	S
1306A	S
1307A	S
1309A	S
1310A	S
1311A	S
1312A	S
1313A	S
1314A	S
1319A	S
1320A	S
1323A	S
1328A	S
1330A	S
1332A	S
1336A	S
1338A	S
1339A	S
1342A	S
1343A	S
1344A	S
1347A	S
1348A	S
1349A	S
1352A	S
1356A	S
1358A	S
1359A	S
1361A	S
1362A	S
1370A	S
1373A	S
1376A	S
1378A	S
1381A	S
1382A	S
1383A	S
1387A	S
1388A	S
1389A	S
1390A	S
1392A	S
1395A	S
1396A	S
1398A	S
1400A	S
1401A	S
1402A	S
1403A	S
1404A	S
1405A	S
1406A	S
1407A	S
1408A	S
1412A	S
1414A	S
1415A	S
1417A	S
1418A	S
1423A	S
1425A	S
1427A	S
ALQ02A	S
ALQ03A	S
1276A_WHYD230712363_A	S
1276A_WHYD230712364_A	S
1296A_WHYD230712368_A	S
1296A_WHYD230712369_A	S
1052	S
1087	S
1097	S
1109	S
1111	S
1117	S
1124	S
1144	S
1150	S
1154	S
1158	S
1177	S
1185	S
1192	S
1197	S
1210	S
1214	S
1216	S
1222	S
1223	S
1231	S
1233	S
1236	S
1237	S
1238	S
1239	S
1240	S
1244	S
1245	S
1250	S
1253	S
1257	S
1260	S
1262	S
1263	S
1265	S
1271	S
1273	S
1277	S
1278	S
1282	S
1284	S
1286	S
1287	S
1290	S
1291	S
1292	S
1293	S
1294	S
1295	S
1297	S
1299	S
1300	S
1301	S
1302	S
1303	S
1304	S
1305	S
1308	S
1309	S
1310	S
1313	S
1315	S
1316	S
1318	S
1320	S
1321	S
1324	S
1325	S
1327	S
1328	S
1329	S
1331	S
1337	S
1341	S
1350	S
1351	S
1353	S
1360	S
1364	S
1366	S
1369	S
1372	S
1374	S
1379	S
1384	S
1385	S
1397	S
1409	S
1416	S
1424	S
Bull_1271	S
Bull_1273	S
Bull_1292	S
Bull_1294	S
Bull_1300	S
Bull_1303	S
Bull_1321	S
Bull_1324	S

## Sheet: 芯片结果验证
Aan_assr01	SRR1346376
Aan_assr02	SRR1348573
Aan_assr03	SRR1355237
Aan_assr04	SRR1365129
Aan_assr05	SRR1425124
Aan_assr06	SRR1525583
Aan_assr07	SRR1525686
Aan_assr08	SRR1525687
Aan_assr09	SRR1525688
Aan_chi01	芯片测安格斯
Chals_cs01	SRR1343167
Chals_cs02	SRR1343168
Chals_cs03	SRR1343171
Chals_cs04	SRR1343173
Chals_cs05	SRR1348584
Chals_cs06	SRR1355254
Chals_cs07	SRR1355258
Chals_cs08	SRR1365122
Chals_cs09	SRR1365145
GF_GF01	SRR5507283
GF_GF02	SRR5507284
GF_GF03	SRR5507285
GF_GF04	SRR5507286
Hfd_Hfd01	SRR1343160
Hfd_Hfd02	SRR1346382
Hfd_Hfd03	SRR1346383
Hfd_Hfd04	SRR1346385
Hfd_Hfd05	SRR1346387
Hfd_Hfd06	SRR1365124
Hfd_Hfd07	SRR1365126
Hfd_Hfd08	SRR1365128
Hfd_Hfd09	SRR1365131
Hfd_Hfd10	SRR1365137
Jian_chi01	芯片测吉安
Jian_chi02	芯片测吉安
Jian_Jan01	SRR5507279
Jian_Jan02	SRR5507280
Jian_Jan03	SRR5507281
Jian_Jan04	SRR5507282
Jinj_Jj01	SRR5507274
Jinj_Jj02	SRR5507275
Jinj_Jj03	SRR5507276
Jinj_Jj04	SRR5507278
JXA_JXA02	SRR11875131
JXA_JXA05	SRR11875134
JXA_JXA13	SRR11875142
JXA_JXA14	SRR11875143
JXA_JXA15	SRR11875144
JXA_JXA17	SRR11875146
JXA_JXA19	SRR11875148
JXA_JXA20	SRR11875149
JXA_JXA22	SRR11875151
JXA_JXA23	SRR11875152
LQ_LQ01	SRR5507188
LQ_LQ02	SRR5507189
LQ_LQ03	SRR5507190
LXC_LXC01	芯片测鲁西
LXC_LXC02	芯片测鲁西
LXC_LXC03	芯片测鲁西
Mog_Mog01	SRR5507264
Mog_Mog02	SRR5507266
Mog_Mog03	SRR5507267
NAY_NAY02	芯片测南阳
NAY_NAY04	芯片测南阳
NAY_NY02	SRR5507234
Pie_Pie01	SRR1525596
Pie_Pie02	SRR1525599
Pie_Pie03	SRR1525603
Pie_Pie04	SRR1525604
Pie_Pie05	SRR1525606
QIC_CRR61	CRR822595
QIC_CRR65	CRR822599
QIC_CRR67	CRR822601
QIC_CRR72	CRR822606
QIC_CRR74	CRR822608
QIC_CRR81	CRR822615
QIC_QIC01	芯片测秦川
QIC_QIC06	芯片测秦川
QIC_S05	1087
QIC_S100	1315
QIC_S104	1320
QIC_S136	1361A
QIC_S146	1378A
QIC_S154	1388A
QIC_S156	1390A
QIC_S157	1392A
QIC_S158	1395A
QIC_S166	1404A
QIC_S192	Bull_1321
QIC_S21	1177
QIC_S32	1216
QIC_S44	1245
QIC_S50	1262
QIC_S61	1279A
QIC_S63	1284
QIC_S69	1292
QIC_S81	1300
QIC_S87	1305
QIC_S90	1308
QIC_S99	1314A
Aan_Red01	SRR1343172
Aan_Red02	SRR1355239
Aan_Red03	SRR1365103
Aan_Red04	SRR1365113
Aan_Red05	SRR1525580
Aan_Red06	SRR1525581
Aan_Red07	SRR1525600
Aan_Red08	SRR1525613
Aan_Red09	SRR1525614
Simen_Si01	SRR1525617
Simen_Si02	SRR1525619
Simen_Si03	SRR1525621
Simen_Si04	SRR1525700
Simen_Si05	SRR1525701
Simen_Si07	SRR1525703
Simen_Si08	SRR1525705
TB_TB01	SRR5507245
TB_TB02	SRR5507246
TB_TB03	SRR5507247
TB_TB04	SRR5507248
TB_TB05	SRR5507249
Wan_Wan01	SRR5507195
Wan_Wan02	SRR5507196
Wan_Wan03	SRR5507197
Wan_Wan04	SRR5507198
Zaos_za02	CRR822643
Zaos_za04	CRR822645
Zaos_za06	CRR822647
Zaos_za08	CRR822649
Zaos_za11	CRR822652
Zaos_za12	CRR822653
Zaos_za14	CRR822655
Zaos_za15	CRR822656
Zaos_za16	CRR822657
Zaos_za17	CRR822658
